# Supplementary material for: Prognosis of Advanced Heart Failure Patients according to Their Hemodynamic Profile Based on the Modified Forrester Classification
Source: MDPI journal article supplement (doi:10.3390/jcm11133663), 2022-06-24
Supplement: s1 [file s1]

**Supplemental Table S1.** Adjusted association of Forrester's profiles with outcomes according to PCWP and CVP.

| Model adjusted on age, gender and eGFR                         |           |                             |                             |                                  |
|----------------------------------------------------------------|-----------|-----------------------------|-----------------------------|----------------------------------|
| According to CVP                                               | Warm-Dry  | Cold-Dry                    | Warm-Wet                    | Cold-Wet                         |
| Waitlist death or urgent heart transplant or LVAD implantation | Reference | 1.79 (0.46–6.93)<br>p=0.399 | 0.88 (0.25–3.14)<br>p=0.842 | <b>3.40 (1.12–10.29) p=0.030</b> |
| According to PCWP                                              | Warm-Dry  | Cold-Dry                    | Warm-Wet                    | Cold-Wet                         |
| Waitlist death or urgent heart transplant or LVAD implantation | Reference | 2.00 (0.53–7.57)<br>p=0.308 | 1.25 (0.33–4.67)<br>p=0.742 | 2.82 (0.86–9.24)<br>p=0.087      |

CVP= central veinous pressure; eGFR = estimated glomerular filtration rate; LVAD = left ventricular assist device; PCWP= pulmonary capillary wedge pressure
